# Supplementary material for: Next-generation sequencing for tumor mutation quantification using liquid biopsies
Source: publisher site journal article supplement (doi:10.1515/cclm-2019-0745), 2019-08-30
Supplement: Supplementary file 1 [file Supplemental Caption.docx]

**Supplemental Table 1.** List of the 11 genes and genomic regions tested by the Oncomine Lung cfDNA assay.

**Supplemental Table 2**. Clinico-pathological features of study population.

**Supplemental Table 3**. Mutations detected by NGS and further confirmed by dPCR**.**

**Supplemental Table 4.** MAFs for each mutation assessed by NGS and digital PCR

**Supplemental Figure 1**. Plot representing cfDNA concentration according to tumor stage.

**Supplemental Figure 2.** Correlation between p.T790M mutation MAF values, assessed by NGS and dPCR.
