# Supplementary material for: Next-generation sequencing for tumor mutation quantification using liquid biopsies
Source: publisher site journal article supplement (doi:10.1515/cclm-2019-0745), 2019-08-30
Supplement: Supplementary file 3 [file Supplemental table1.docx]

| GENE | START | END | EXON |
| --- | --- | --- | --- |
| *NRAS* | 115256504 | 115256546 | Exon 3 |
| *NRAS* | 115258729 | 115258763 | Exon 2 |
| *ALK* | 29432658 | 29432693 | Exon 25 |
| *ALK* | 29436821 | 29436865 | Exon 24 |
| *ALK* | 29443594 | 29443638 | Exon 23 |
| *ALK* | 29443670 | 29443708 | Exon 23 |
| *ALK* | 29445156 | 29445220 | Exon 22 |
| *ALK* | 29445255 | 29445324 | Exon 22 |
| *ALK* | 29445424 | 29445485 | Exon 21 |
| *PIK3CA* | 178936066 | 178936108 | Exon 10 |
| *PIK3CA* | 178952065 | 178952102 | Exon 21 |
| *ROS1* | 117641093 | 117641133 | Exon 36 |
| *EGFR* | 55241670 | 55241715 | Exon18 |
| *EGFR* | 55242453 | 55242493 | Exon 19 |
| *EGFR* | 55248979 | 55249031 | Exon 20 |
| *EGFR* | 55249059 | 55249104 | Exon 20 |
| *EGFR* | 55259443 | 55259533 | Exon 21 |
| *MET* | 116411985 | 116412078 | Exon 14 |
| *MET* | 116417443 | 116417483 | Exon 16 |
| *MET* | 116423398 | 116423433 | Exon 19 |
| *MET* | 116423467 | 116423510 | Exon 19 |
| *BRAF* | 140453089 | 140453156 | Exon 15 |
| *BRAF* | 140481380 | 140481425 | Exon 11 |
| *KRAS* | 25380260 | 25380289 | Exon 3 |
| *KRAS* | 25398271 | 25398310 | Exon 2 |
| *MAP2K1* | 66727422 | 66727467 | Exon 2 |
| *MAP2K1* | 66729130 | 66729174 | Exon 3 |
| *MAP2K1* | 66774107 | 66774155 | Exon 6 |
| *TP53* | 7574010 | 7574045 | Exon 11 |
| *TP53* | 7577080 | 7577141 | Exon 8 |
| *TP53* | 7577519 | 7577592 | Exon 7 |
| *TP53* | 7578165 | 7578248 | Exon 6 |
| *TP53* | 7578387 | 7578477 | Exon 5 |
| *TP53* | 7579280 | 7579326 | Exon 4 |
| *ERBB2* | 37880965 | 37881007 | Exon 20 |
