# Supplementary material for: Next-generation sequencing for tumor mutation quantification using liquid biopsies
Source: publisher site journal article supplement (doi:10.1515/cclm-2019-0745), 2019-08-30
Supplement: Supplementary file 5 [file Supplemental table2 .docx]

| **Feature** | **Grouping** | **N** | **%** |
| --- | --- | --- | --- |
| **Age (years)** | Median | 64.5 (41-85) |  |
| **Sex** | Male | 29 | 56% |
| Female | 23 | 44% |
| **Smoking status** | Current/ex | 32 | 62% |
| Never | 20 | 38% |
| **Histology** | Adenocarcinoma | 40 | 77% |
| Squamous cell carcinoma | 10 | 19% |
| Others | 2 | 4% |
| **Stage** | IIIA | 5 | 10% |
| IIIB | 11 | 25% |
| IV | 36 | 65% |
| **Molecular status** | EGFR mutation | 31 | 60% |
| ALK rearrangement | 4 | 8% |
| Negative | 17 | 33% |
