# Supplementary material for: Next-generation sequencing for tumor mutation quantification using liquid biopsies
Source: publisher site journal article supplement (doi:10.1515/cclm-2019-0745), 2019-08-30
Supplement: Supplementary file 7 [file Supplemental table3.docx]

| ***Sample*** | ***Gene*** | ***mutation designation (protein)*** | ***mutation designation (cDNA)*** | ***COSMIC ID*** | ***dPCR performed*** | ***assay type*** | ***dPCR result*** |
| --- | --- | --- | --- | --- | --- | --- | --- |
| 1 | *EGFR* | p.Glu746_Ala750del | c.2236_2250delGAATTAAGAGAAGCA | COSM6225 | YES | PREDESIGNED | detectable |
| 1 | *EGFR* | p.Thr790Met | c.2369C>T | COSM6240 | YES | PREDESIGNED | detectable |
| 1 | *TP53* | p.Arg273Cys | c.817C>T | COSM10659 | NO | - | NA |
| 2 | *EGFR* | p.Leu858Arg | c.2573T>G | COSM6224 | YES | PREDESIGNED | detectable |
| 3 | *KRAS* | p.Gly13Asp | c.38G>A | COSM532 | YES | PREDESIGNED | detectable |
| 5 | *EGFR* | p.Thr790Met | c.2369C>T | COSM6240 | YES | PREDESIGNED | detectable |
| 5 | *EGFR* | p.Leu858Arg | c.2573T>G | COSM6224 | YES | PREDESIGNED | detectable |
| 6 | *EGFR* | p.Leu858Arg | c.2573T>G | COSM6224 | YES | PREDESIGNED | detectable |
| 6 | *TP53* | p.Tyr205Cys | c.614A>G | COSM43947 | NO | - | NA |
| 7 | *EGFR* | p.Glu746_Ala750del | c.2235_2249delGGAATTAAGAGAAGC | COSM6223 | YES | PREDESIGNED | detectable |
| 7 | *EGFR* | p.Thr790Met | c.2369C>T | COSM6240 | YES | PREDESIGNED | detectable |
| 8 | *EGFR* | p.Thr790Met | c.2369C>T | COSM6240 | YES | PREDESIGNED | detectable |
| 8 | *EGFR* | p.Leu858Arg | c.2573T>G | COSM6224 | YES | PREDESIGNED | detectable |
| 10 | *EGFR* | p.Glu746_Ala750del | c.2235_2249delGGAATTAAGAGAAGC | COSM6223 | YES | PREDESIGNED | detectable |
| 10 | *EGFR* | p.Thr790Met | c.2369C>T | COSM6240 | YES | PREDESIGNED | detectable |
| 10 | *TP53* | p.Gly245Ser | c.733G>A | COSM6932 | YES | PREDESIGNED | detectable |
| 12 | *EGFR* | p.Glu746_Ala750del | c.2236_2250delGAATTAAGAGAAGCA | COSM6225 | YES | PREDESIGNED | detectable |
| 12 | *EGFR* | p.Thr790Met | c.2369C>T | COSM6240 | YES | PREDESIGNED | detectable |
| 12 | *TP53* | p.Arg273His | c.818G>A | COSM10660 | YES | PREDESIGNED | not detectable or below LOD |
| 13 | *EGFR* | p.Gly719Cys | c.2155G>T | COSM6253 | YES | PREDESIGNED | detectable |
| 13 | *EGFR* | p.Ser768Ile | c.2303G>T | COSM6241 | YES | PREDESIGNED | detectable |
| 13 | *EGFR* | p.Thr790Met | c.2369C>T | COSM6240 | YES | PREDESIGNED | detectable |
| 13 | *TP53* | p.Tyr220Cys | c.659A>G | COSM10758 | NO | - | NA |
| 15 | *EGFR* | p.Thr790Met | c.2369C>T | COSM6240 | YES | PREDESIGNED | detectable |
| 15 | *EGFR* | p.Leu858Arg | c.2573T>G | COSM6224 | YES | PREDESIGNED | detectable |
| 16 | *EGFR* | p.Thr790Met | c.2369C>T | COSM6240 | YES | PREDESIGNED | detectable |
| 16 | *EGFR* | p.Leu858Arg | c.2573T>G | COSM6224 | YES | PREDESIGNED | detectable |
| 19 | *EGFR* | p.Glu746_Ala750del | c.2236_2250delGAATTAAGAGAAGCA | COSM6225 | YES | PREDESIGNED | detectable |
| 20 | *EGFR* | p.Glu746_Ala750del | c.2236_2250delGAATTAAGAGAAGCA | COSM6225 | YES | PREDESIGNED | detectable |
| 21 | *EGFR* | p.Leu747_Pro753delinsSer | c.2240_2257delTAAGAGAAGCAACATCTC | COSM12370 | YES | PREDESIGNED | detectable |
| 21 | *TP53* | p.Arg282Trp | c.844C>T | COSM10704 | YES | PREDESIGNED | detectable |
| 22 | *EGFR* | p.Thr790Met | c.2369C>T | COSM6240 | YES | PREDESIGNED | detectable |
| 22 | *EGFR* | p.Leu858Arg | c.2573T>G | COSM6224 | YES | PREDESIGNED | detectable |
| 22 | *TP53* | p.Cys277Phe | c.830G>T | COSM10749 | NO | - | NA |
| 28 | *PIK3CA* | p.His1047Arg | c.3140A>G | COSM775 | YES | PREDESIGNED | not detectable or below LOD |
| 31 | *EGFR* | p.Leu747_Thr751del | c.2240_2254delTAAGAGAAGCAACAT | COSM12369 | YES | PREDESIGNED | detectable |
| 31 | *EGFR* | p.Thr790Met | c.2369C>T | COSM6240 | YES | PREDESIGNED | detectable |
| 31 | *MET* | p.Thr1010Ile | c.3029C>T | COSM707 | YES | PREDESIGNED | detectable |
| 32 | *EGFR* | p.Leu747_Ala750delinsPro | c.2239_2248delTTAAGAGAAGinsC | COSM12382 | YES | PREDESIGNED | detectable |
| 32 | *EGFR* | p.Thr790Met | c.2369C>T | COSM6240 | YES | PREDESIGNED | detectable |
| 33 | *PIK3CA* | p.Glu545Lys | c.1633G>A | COSM763 | YES | PREDESIGNED | detectable |
| 34 | *ALK* | p.Gly1269Ala | c.3806G>C | COSM1169707 | YES | PREDESIGNED | detectable |
| 35 | *ALK* | p.Gly1269Ala | c.3806G>C | COSM1169707 | YES | PREDESIGNED | detectable |
| 36 | *TP53* | p.Arg273Gly | c.817C>G | COSM43843 | YES | CUSTOM MADE | detectable |
| 38 | *TP53* | p.Arg273Ser | c.817C>A | COSM43909 | YES | CUSTOM MADE | detectable |
| 40 | *PIK3CA* | p.Glu545Lys | c.1633G>A | COSM763 | YES | PREDESIGNED | detectable |
| 43 | *TP53* | p.Val157Phe | c.469G>T | COSM10670 | YES | PREDESIGNED | detectable |
| 45 | *TP53* | p.Val157Phe | c.469G>T | COSM10670 | YES | PREDESIGNED | not detectable or below LOD |
| 46 | *NRAS* | p.Gly13Asp | c.38G>A | COSM573 | YES | PREDESIGNED | not detectable or below LOD |
| 46 | *TP53* | p.Arg282Gly | c.844C>G | COSM10992 | YES | CUSTOM MADE | detectable |
| 47 | *TP53* | p.Met237Ile | c.711G>T | COSM11063 | NO | - | NA |
| 48 | *TP53* | p.Arg175His | c.524G>A | COSM10648 | NO | - | NA |
| 49 | *BRAF* | p.Val600Glu | c.1799T>A | COSM476 | YES | PREDESIGNED | detectable |
| 49 | *TP53* | p.Tyr234Cys | c.701A>G | COSM10725 | NO | - | NA |
| 50 | *EGFR* | p.Met766_Ala767insAlaSerVal | c.2308_2309insCCAGCGTGG | COSM12426 | YES | CUSTOM MADE | not detectable or below LOD |
| 50 | *TP53* | p.Arg283Pro | c.848G>C | COSM10743 | YES | CUSTOM MADE | detectable |
| 51 | *KRAS* | p.Gly13Val | c.38G>T | COSM534 | YES | PREDESIGNED | detectable |
| 51 | *TP53* | p.Ala159Val | c.476C>T | COSM11148 | YES | CUSTOM MADE | detectable |
| 54 | *EGFR* | p.Glu746_Ala750del | c.2235_2249delGGAATTAAGAGAAGC | COSM6223 | YES | PREDESIGNED | detectable |
| 55 | *EGFR* | p.Leu747_Pro753delinsSer | c.2240_2257delTAAGAGAAGCAACATCTC | COSM12370 | YES | PREDESIGNED | detectable |
| 56 | *MET* | p.Thr1010Asn | c.3029C>A | - | YES | PREDESIGNED | detectable |
