# Supplementary material for: Next-generation sequencing for tumor mutation quantification using liquid biopsies
Source: publisher site journal article supplement (doi:10.1515/cclm-2019-0745), 2019-08-30
Supplement: Supplementary file 9 [file Supplemental table4.docx]

| Sample | Gene | Mutation (protein level) | CDS mutation | CHROM | POS | Oncomine MAF(%) | dPCR MAF (%) |
| --- | --- | --- | --- | --- | --- | --- | --- |
| 1 | *EGFR* | p.Glu746_Ala750del | c.2236_2250delGAATTAAGAGAAGCA | chr7 | 55242466 | 0,31 | 0,16 |
| 1 | *EGFR* | p.Thr790Met | c.2369C>T | chr7 | 55249071 | 0,13 | 0,21 |
| 1 | *TP53* | p.Arg273Cys | c.817C>T | chr17 | 7577121 | 0,12 | NA |
| 2 | *EGFR* | p.Leu858Arg | c.2573T>G | chr7 | 55259515 | 33,88 | 38,95 |
| 3 | *KRAS* | p.Gly13Asp | c.38G>A | chr12 | 25398281 | 0,19 | 0,13 |
| 3 | *EGFR* | p.D770_N771insG | c.2310_2311insGGT | chr7 | 55181319 | 0,00 | 0,22 |
| 5 | *EGFR* | p.Thr790Met | c.2369C>T | chr7 | 55249071 | 0,10 | 0,14 |
| 5 | *EGFR* | p.Leu858Arg | c.2573T>G | chr7 | 55259515 | 2,32 | 2,39 |
| 6 | *EGFR* | p.Leu858Arg | c.2573T>G | chr7 | 55259515 | 0,27 | 0,36 |
| 6 | *TP53* | p.Tyr205Cys | c.614A>G | chr17 | 7578235 | 0,22 | NA |
| 7 | *EGFR* | p.Glu746_Ala750del | c.2235_2249delGGAATTAAGAGAAGC | chr7 | 55242465 | 2,20 | 2,25 |
| 7 | *EGFR* | p.Thr790Met | c.2369C>T | chr7 | 55249071 | 0,99 | 0,50 |
| 8 | *EGFR* | p.Thr790Met | c.2369C>T | chr7 | 55249071 | 0,40 | 2,40 |
| 8 | *EGFR* | p.Leu858Arg | c.2573T>G | chr7 | 55259515 | 0,91 | 3,66 |
| 10 | *EGFR* | p.Glu746_Ala750del | c.2235_2249delGGAATTAAGAGAAGC | chr7 | 55242464 | 14,50 | 22,09 |
| 10 | *EGFR* | p.Thr790Met | c.2369C>T | chr7 | 55249071 | 1,01 | 1,22 |
| 10 | *TP53* | p.Gly245Ser | c.733G>A | chr17 | 7577548 | 0,14 | 0,14 |
| 12 | *EGFR* | p.Glu746_Ala750del | c.2236_2250delGAATTAAGAGAAGCA | chr7 | 55242464 | 10,37 | 13,65 |
| 12 | *EGFR* | p.Thr790Met | c.2369C>T | chr7 | 55249071 | 2,98 | 2,85 |
| 12 | *TP53* | p.Arg273His | c.818G>A | chr17 | 7577120 | 0,13 | 0,05 |
| 13 | *EGFR* | p.Gly719Cys | c.2155G>T | chr7 | 55241707 | 2,22 | 2,12 |
| 13 | *EGFR* | p.Ser768Ile | c.2303G>T | chr7 | 55249005 | 2,17 | 1,28 |
| 13 | *EGFR* | p.Thr790Met | c.2369C>T | chr7 | 55249071 | 0,92 | 0,48 |
| 13 | *TP53* | p.Tyr220Cys | c.659A>G | chr17 | 7578190 | 0,11 | NA |
| 15 | *EGFR* | p.Thr790Met | c.2369C>T | chr7 | 55249071 | 0,13 | 0,13 |
| 15 | *EGFR* | p.Leu858Arg | c.2573T>G | chr7 | 55259515 | 0,10 | 0,10 |
| 16 | *EGFR* | p.Thr790Met | c.2369C>T | chr7 | 55249071 | 0,67 | 0,65 |
| 16 | *EGFR* | p.Leu858Arg | c.2573T>G | chr7 | 55259515 | 1,62 | 1,22 |
| 18 | *EGFR* | p.Leu747_Thr751del | c.2240_2254delTAAGAGAAGCAACAT | chr7 | 55242464 | 0,00 | 0,46 |
| 19 | *EGFR* | p.Glu746_Ala750del | c.2236_2250delGAATTAAGAGAAGCA | chr7 | 55242464 | 0,22 | 0,66 |
| 20 | *EGFR* | p.Glu746_Ala750del | c.2236_2250delGAATTAAGAGAAGCA | chr7 | 55242464 | 0,41 | 10,50 |
| 21 | *EGFR* | p.Leu747_Pro753delinsSer | c.2240_2257delTAAGAGAAGCAACATCTC | chr7 | 55242464 | 15,98 | 18,60 |
| 21 | *TP53* | p.Arg282Trp | c.844C>T | chr17 | 7577094 | 13,42 | 13,54 |
| 22 | *EGFR* | p.Thr790Met | c.2369C>T | chr7 | 55249071 | 0,29 | 0,11 |
| 22 | *EGFR* | p.Leu858Arg | c.2573T>G | chr7 | 55259515 | 0,13 | 0,80 |
| 22 | *TP53* | p.Cys277Phe | c.830G>T | chr17 | 7577108 | 0,22 | NA |
| 28 | *PIK3CA* | p.His1047Arg | c.3140A>G | chr3 | 178952085 | 0,11 | 0,08 |
| 28 | *EGFR* | p.Glu746_Ala750del | c.2236_2250delGAATTAAGAGAAGCA | chr7 | 55242464 | 0,00 | 0,47 |
| 31 | *EGFR* | p.Leu747_Thr751del | c.2240_2254delTAAGAGAAGCAACAT | chr7 | 55242464 | 0,49 | 0,90 |
| 31 | *EGFR* | p.Thr790Met | c.2369C>T | chr7 | 55249071 | 0,19 | 0,80 |
| 31 | *MET* | p.Thr1010Ile | c.3029C>T | chr7 | 116411990 | 99,83 | 99,95 |
| 32 | *EGFR* | p.Leu747_Ala750delinsPro | c.2239_2248delTTAAGAGAAGinsC | chr7 | 55242464 | 48,68 | 50,76 |
| 32 | *EGFR* | p.Thr790Met | c.2369C>T | chr7 | 55249071 | 33,60 | 37,70 |
| 33 | *PIK3CA* | p.Glu545Lys | c.1633G>A | chr3 | 178936091 | 0,54 | 0,90 |
| 34 | *ALK* | p.Gly1269Ala | c.3806G>C | chr2 | 29432682 | 0,87 | 0,42 |
| 35 | *ALK* | p.Gly1269Ala | c.3806G>C | chr2 | 29432682 | 2,99 | 2,81 |
| 36 | *TP53* | p.Arg273Gly | c.817C>G | chr17 | 7577121 | 0,55 | 0,17 |
| 38 | *TP53* | p.Arg273Ser | c.817C>A | chr17 | 7577121 | 3,08 | 2,96 |
| 40 | *PIK3CA* | p.Glu545Lys | c.1633G>A | chr3 | 178936091 | 1,96 | 2,81 |
| 43 | *TP53* | p.Val157Phe | c.469G>T | chr17 | 7578461 | 3,50 | 5,39 |
| 45 | *TP53* | p.Val157Phe | c.469G>T | chr17 | 7578461 | 0,16 | 0,00 |
| 46 | *NRAS* | p.Gly13Asp | c.38G>A | chr1 | 115258736 | 0,32 | 0,00 |
| 46 | *TP53* | p.Arg282Gly | c.844C>G | chr17 | 7577094 | 2,75 | 2,99 |
| 47 | *TP53* | p.Met237Ile | c.711G>T | chr17 | 7577570 | 0,11 | NA |
| 48 | *TP53* | p.Arg175His | c.524G>A | chr17 | 7578406 | 0,64 | NA |
| 49 | *BRAF* | p.Val600Glu | c.1799T>A | chr7 | 140453136 | 0,25 | 0,17 |
| 49 | *TP53* | p.Tyr234Cys | c.701A>G | chr17 | 7577580 | 0,14 | NA |
| 50 | *EGFR* | p.Met766_Ala767insAlaSerVal | c.2308_2309insCCAGCGTGG | chr7 | 55248998 | 12,54 | 0,00 |
| 50 | *TP53* | p.Arg283Pro | c.848G>C | chr17 | 7577090 | 20,41 | 21,88 |
| 51 | *KRAS* | p.Gly13Val | c.38G>T | chr12 | 25398281 | 0,31 | 0,28 |
| 51 | *TP53* | p.Ala159Val | c.476C>T | chr17 | 7578454 | 1,94 | 0,14 |
| 54 | *EGFR* | p.Glu746_Ala750del | c.2235_2249delGGAATTAAGAGAAGC | chr7 | 55242464 | 5,31 | 6,39 |
| 54 | *EGFR* | p.S768I | c.2303G>T | chr7 | 55181312 | 0,00 | 0,30 |
| 55 | *EGFR* | p.Leu747_Pro753delinsSer | c.2240_2257delTAAGAGAAGCAACATCTC | chr7 | 55242464 | 3,02 | 5,70 |
| 56 | *MET* | p.Thr1010Asn | c.3029C>A | chr7 | 116411990 | 0,17 | 0,25 |
